# Supplementary material for: Reevaluating Symbiotic Digestion in Cockroaches: Unveiling the Hindgut’s Contribution to Digestion in Wood-Feeding Panesthiinae (Blaberidae)
Source: MDPI journal article supplement (doi:10.3390/insects14090768), 2023-09-14
Supplement: s1 [file s1]

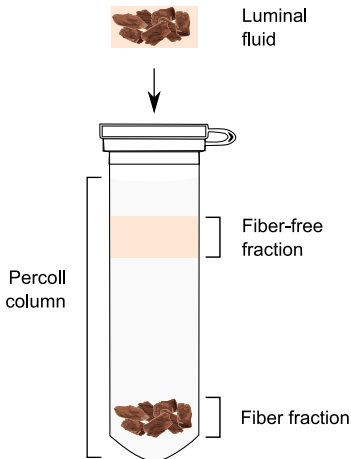

**Figure S1.** A schematic representation of the Percoll column used to fractionate the luminal fluid from different gut compartments into a fiber-free fraction (enriched in microbial cells) and the fiber fraction (enriched in wood particles and their associated microbial cells).
